# Supplementary material
Source: bioRxiv or medRxiv preprint supplement (https://www.biorxiv.org/highwire/filestream/36702/field_highwire_adjunct_files/0/125211-1.pdf)

L 1 2 3 4 5 6 8 9 10 11 12 13 14 15 L

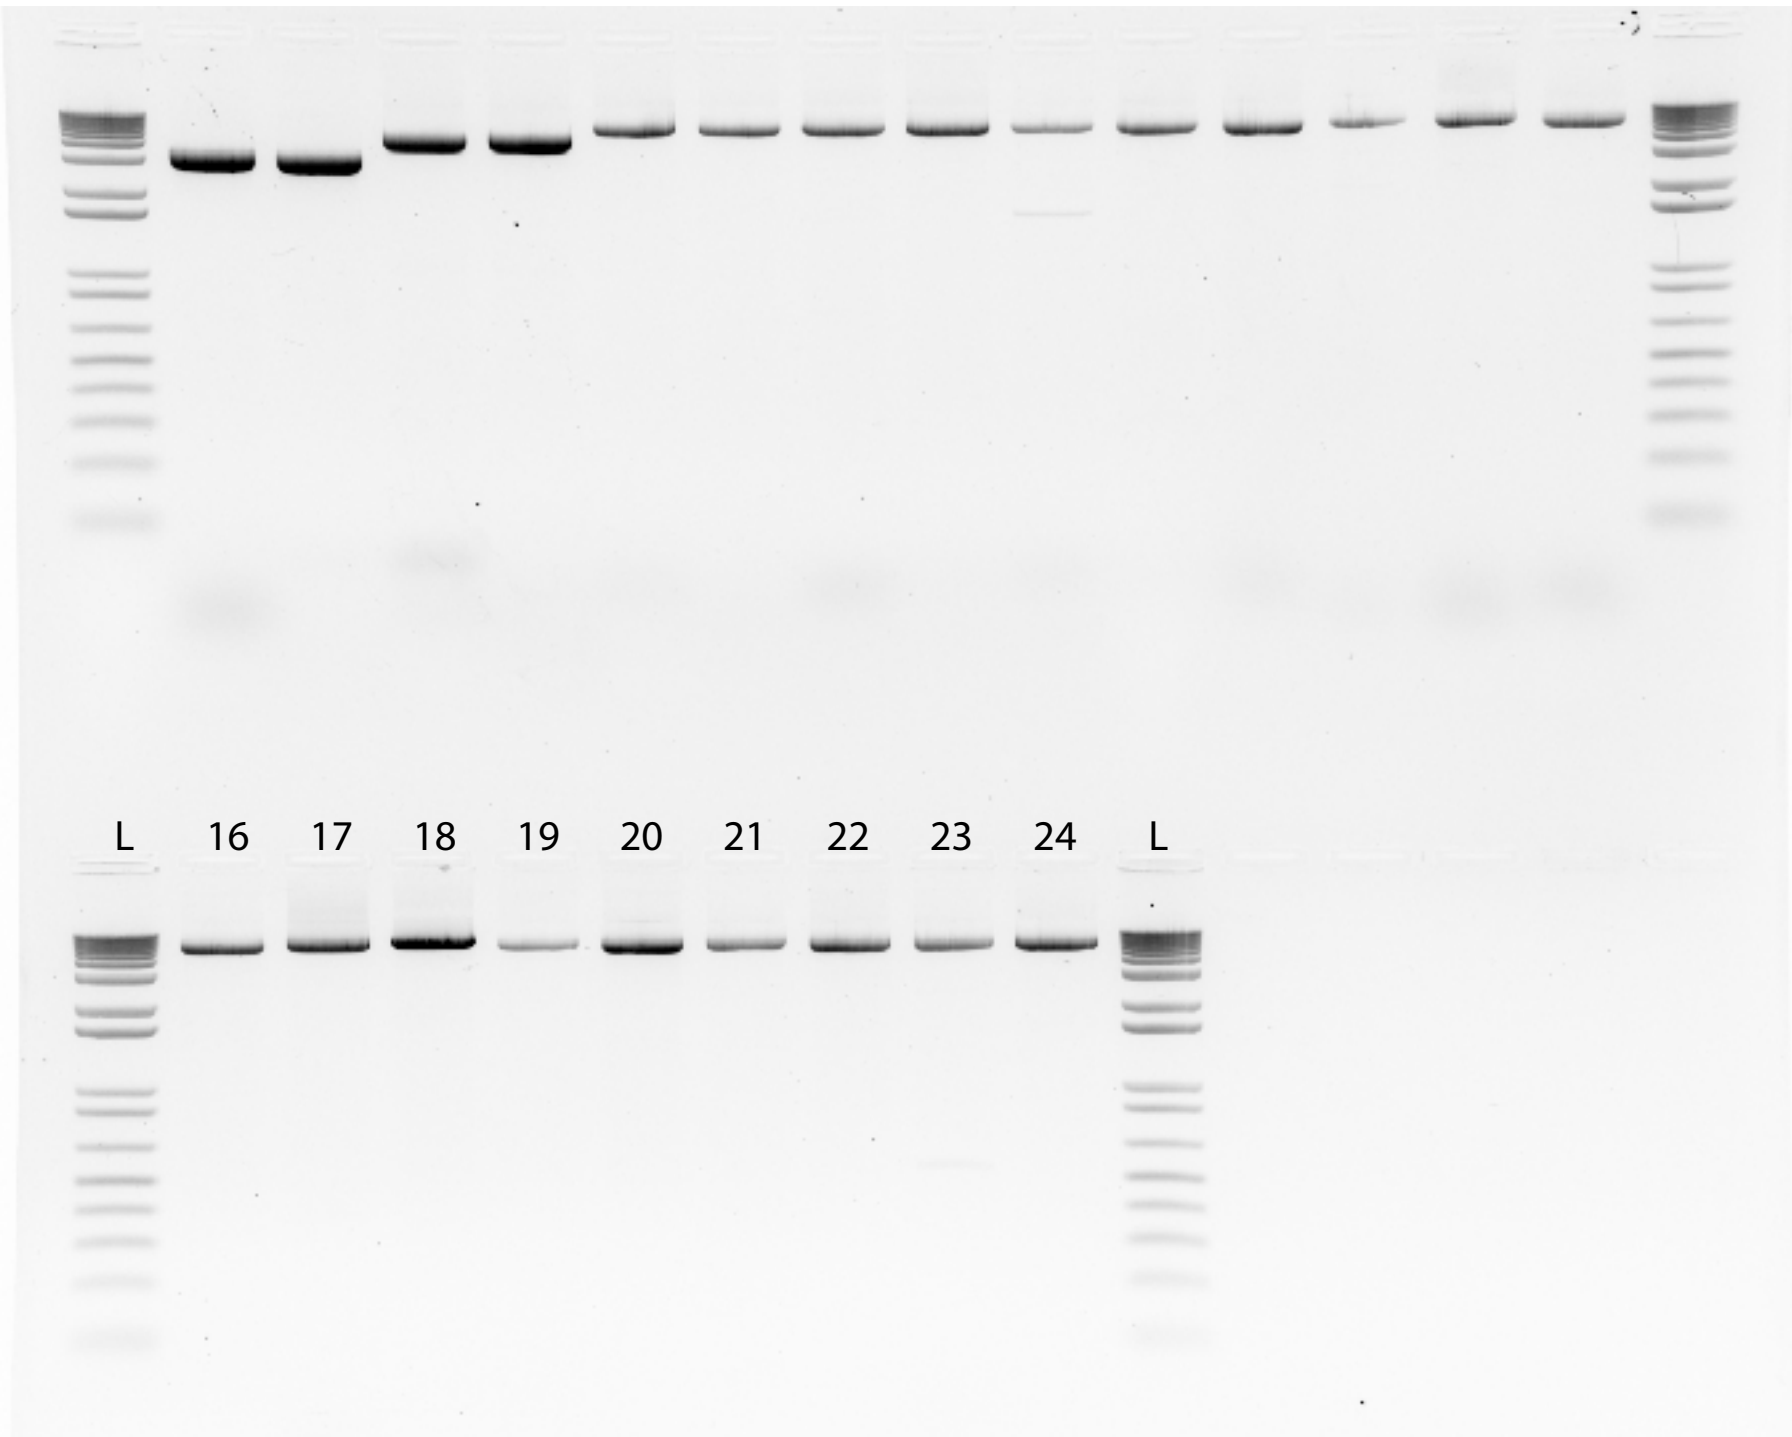

Supplement: Supplementary file [file 125211-1.pdf]
